# Supplementary material
Source: Springer Nature journal article supplement (https://www.springermedizin.de/resource/supplementary/13075_2009_3014_MOESM13_ESM.pdf/9693346)

A

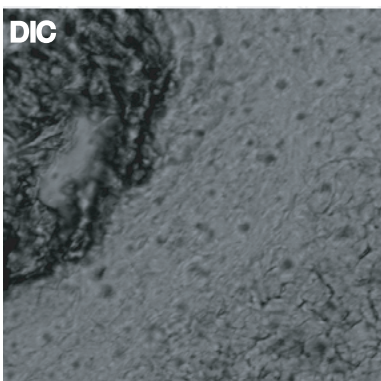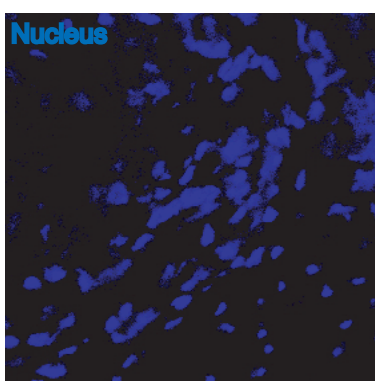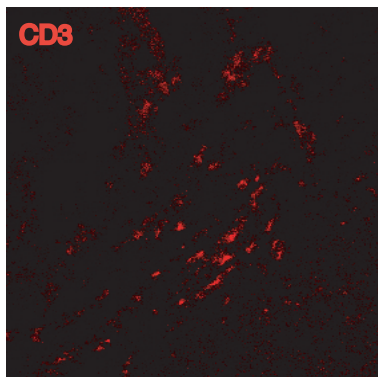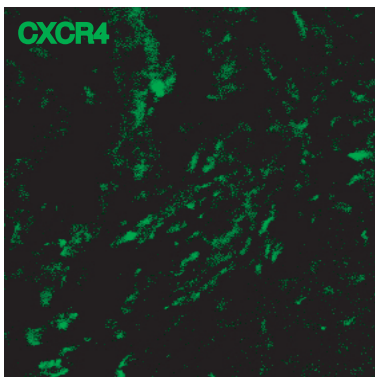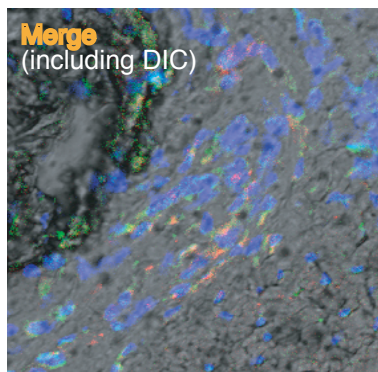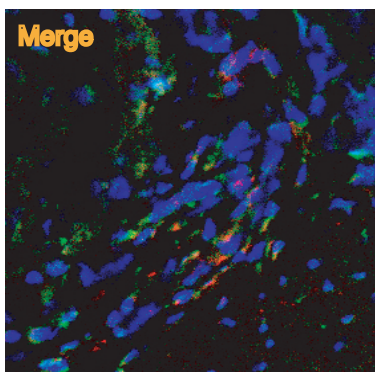

B

CXCR4

anti-CXCR4 antibody

isotype control

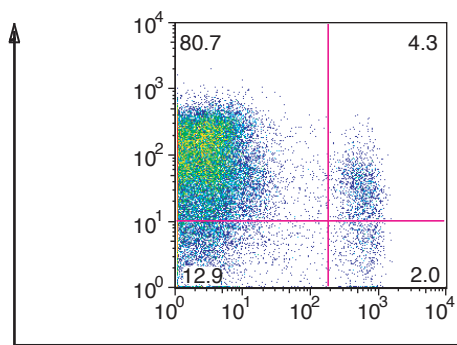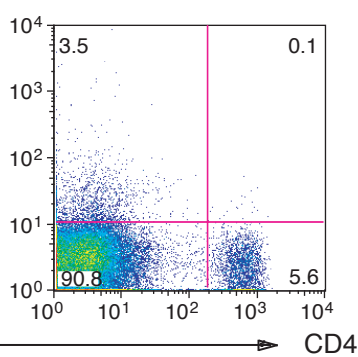

CD4

Supplement: MOESM13 [file 9693346]
